# Supplementary material
Source: publisher figshare collection journal article supplement (https://plos.figshare.com/articles/dataset/_/137067)
Supplement: Supplementary file [file 1]

**Table S. 1. Primers used for investigation of *E. faecalis* PAI presence by long template-PCR.**

| PAI region | Location in <i>gb AF454824.1 </i> | Primer name | Primer sequence                       | Amplicon (bp) |
|------------|-----------------------------------|-------------|---------------------------------------|---------------|
| 1          | C:427                             | PAI164      | ATGCCATGTTTCAGCGAAGTTGCCAATTATC       | 1548          |
|            |                                   | 1 PAI R     | GGAAGATGGACGGTTGATGAAGCCTCAATATG      |               |
| 2a         | 240:9913                          | 2a PAI F    | CAGTTGTCTGAATACGATGCATGTCCCAGCC       | 9674          |
|            |                                   | 2a PAI R    | AAACCAAAGGAACCGAAACGGAAAACTTAGCATGG   |               |
| 2b         | 9869:15934                        | 2b PAI F    | TTTAACCAGCCATGCTAAGTTTTTCCGTTTCGGTTC  | 6066          |
|            |                                   | 2b PAI R    | TTTGAAATAATCTCCAACTTTTCCCCCGTTCCACAC  |               |
| 2c         | 14033:21999                       | 2c PAI F    | AACCATAAAAAGGAACGGAGGGAGCACAAACAAAAGG | 7697          |
|            |                                   | 2c PAI R    | ACTTGCAGTGTGACTGTCTGTCGTAACCTTCACC    |               |
| 3a         | 21566:32079                       | 3a PAI F    | CTCGTCCGTAACGATCTGTTTTATCGCCCTTATC    | 11645         |
|            |                                   | 3a PAI R    | TCAAGTCCGTACAACAGGCACCTTCTTTATCAAGC   |               |
| 3b         | 31320:42730                       | 3b PAI F    | GAAGGCCGTTGCCAATTTTGCATTAGCTTGC       | 11411         |
|            |                                   | 3b PAI R    | TCCTAAGCCTATGGTAAACATGCTGGAGTTGTCTC   |               |
| 4a         | 42395:53473                       | 4a PAI F    | CAAGGTAGTGGAGATGTTTCAGGCTGAGACAACAC   | 11079         |
|            |                                   | 4a PAI R    | CGGATGTTACTTCTGCTGGACTTAAACAAATCCC    |               |
| 4b         | 53440:65000                       | 4b PAI F    | GGGATTGTTTAAAGTCCAGCAGAAGTAACATCCG    | 11561         |
|            |                                   | 4b PAI R    | ACGCCAAGCACAAAGGATAAAGATTGCGAAAG      |               |
| 5a         | 64944:75572                       | 5a PAI F    | GGACGACCTTTATAGACGCGCTTTGCTTTTCG      | 10629         |
|            |                                   | 5a PAI R    | AGTCCCCTTTTTCTGCCATGACACCAGTTAAAATC   |               |
| 5b         | 74158:85588                       | 5b PAI F    | GCTGTGGTCAAGATAGATGGGAAAGAGATTGAGCG   | 11431         |
|            |                                   | 5b PAI R    | GGATCTGAACCGTCTTGTGTCTAGTGTGCCAG      |               |
| 6a         | 85547:94661                       | 6a PAI F    | TGTAGCATACTGGCACACTATGACACAAGACGG     | 9115          |
|            |                                   | 6a PAI R    | CGTGCCCCTAATTACCATAGAGATAGTCGCGTTG    |               |
| 6b         | 93984:102421                      | 6b PAI F    | TGGTAAACGCTGCTCCTGAAATGAAGAGTTTGAC    | 8432          |
|            |                                   | 6b PAI R    | AGGTTTGATACGCAACTACCTTTCCCACTGACG     |               |
| 7a         | 101954:113046                     | 7a PAI F    | TTTTGGGACAGGAACGCTATCAGTTAACGATTGC    | 10821         |
|            |                                   | 7a PAI R    | CCTGCGGTCAAGCACAGTTGCCTTATCTTAG       |               |
| 7b         | 113008:126865                     | 7b PAI F    | ATTAAAGTCAAAAGAGACTGTACTTGTGCGCCCTG   | 13858         |
|            |                                   | 7b PAI R    | TCAGCAAACCTAAGATAAGGCAACTGTGCTTGACC   |               |
| 8a         | 125344:136351                     | 8a PAI F    | TGCTTTAGTGGGTCTGACTAACGGAACAATAG      | 11008         |
|            |                                   | 8a PAI R    | CAACAACACGTCGTCGATCTTTACCTTG          |               |
| 8b         | 135337:146384                     | 8b PAI F    | CACCAATGCACATAATCAAACAATTCTAGGCGTAG   | 11048         |
|            |                                   | 8b PAI R    | GTGGACAAGCACAGTCACAATTAGAAGCAATG      |               |
| 9a         | 146272:C                          | 9 PAI F     | CATCATTCTTTCAGCAAATTGGTTGGCACGC       | 8298          |
|            |                                   | PAI167R     | ATGTTGGTTGAAAGTTGCTTTTGGCAAAC         |               |

PAI regions were chosen arbitrarily as *ca.* 10 Kb overlapping amplicons based on the *E. faecalis* PAI structure of Strain MMH594 (*gb|AF454824.1|*). C, binding site is in the chromosome of *E. faecalis*.
