# Supplementary material
Source: publisher figshare collection journal article supplement (https://plos.figshare.com/articles/dataset/_/137067)
Supplement: Supplementary file [file 1]

Table S. 2. Primers used for investigation of *E. faecalis* PAI presence by regular PCR.

| Primer name | Primer sequence           | Amplicon (bp) |                  |                         |     |
|-------------|---------------------------|---------------|------------------|-------------------------|-----|
| PAIefs-11F  | AGAATTGTCTTTGGGCTTCTC     | 378           | PAIefs-60F       | GCTTGACCAGATGACTAATGC   | 180 |
| PAIefs-11R  | GCCGAATGTTGCTAAAGTTAC     |               | PAIefs-60R       | GCAACGAACATCAACAAATG    |     |
| PAIefs-12F  | GGAAAATGTTTAAAGCCCC       | 486           | PAIefs-61F       | GGATTTCCGATTGCTTCAGC    | 198 |
| PAIefs-12R  | GGCAACGTGAGAGTAACAG       |               | PAIefs-61R       | AGCGACTATTACTCATCGACC   |     |
| PAIefs-21F  | GCCATTAAAAAGTAAAGAGCCG    | 500           | PAIefs-62F       | GAAGCCATTGACCGATTAGG    | 185 |
| PAIefs-21R  | CTTGATATGCGCGATAAAGTTG    |               | PAIefs-62R       | TGTTCCGCAATCATTGCC      |     |
| PAIefs-55F  | AGGATTGCTTACGGTTGATGG     | 357           | PAIefs-66F       | TCAAGCTGGTGTGGATTTTG    | 198 |
| PAIefs-55R  | TTTGCTTTCTCTGTTTGCTCAC    |               | PAIefs-66R       | CCACCAACGACAATTCCTG     |     |
| PAIefs-58F  | GGTGTGTTCCTGTGGTTAG       | 536           | PAIefs-67F       | GCAACTAGCTGATCCAAACC    | 181 |
| PAIefs-58R  | TTAGGAGTCGTCCCTGTTATC     |               | PAIefs-67R       | AAATGAAGTCAAGCCACCAC    |     |
| PAIefs-65F  | TTTTCCAGCTAAAGAACCACC     | 446           | PAIefs-68F       | TTGACTGGACGAATTGAAGC    | 222 |
| PAIefs-65R  | GTAATACCACGATGAAGTTGC     |               | PAIefs-68R       | GACAGATGGATCTTTTCTCTGC  |     |
| PAIefs-70F  | CTTGGGATAGTGAAACAAGATGG   | 377           | PAIefs-69F       | GCCATACTTCCGTCAATAACG   | 163 |
| PAIefs-70R  | CAAGGACTGCGCTATGAAG       |               | PAIefs-69R       | TGTCACTACCATTATCACTGC   |     |
| PAIefs-84F  | GCCGATCCTACATATACAAACG    | 417           | PAIefs-72F       | TGAAAATGGCACTCCAACAG    | 226 |
| PAIefs-84R  | TCCAATAGTTGATCATACTGCG    |               | PAIefs-72R       | CCGTACATCATAGGCACAATC   |     |
| PAIefs-87F  | GTTATTGGCAGTGCCGTTAG      | 433           | PAIefs-73F       | GAGTACTGGATTATTCAAGGCG  | 212 |
| PAIefs-87R  | GACTTGTGAAAGTCCTCGAAG     |               | PAIefs-73R       | TTGAATGGCTTCTTCACCG     |     |
| PAIefs-89F  | AAGTATTCTAGGCAGTTTGCG     | 403           | PAIefs-74F       | GGGATAAGCAGACGATTATCGG  | 155 |
| PAIefs-89R  | GCCACGTTCTTTAGAAATTCG     |               | PAIefs-74R       | TCTTGTGCGTGGTGCTAAC     |     |
| PAIefs-91F  | TTGGGACAGGAACGCTATC       | 487           | PAIefs-76F       | TGCCATAATGGGTATGAGGAC   | 212 |
| PAIefs-91R  | GGCCCCATACTTTTGTCTATC     |               | PAIefs-76R       | CATGCTGACCTTTAACGGTAG   |     |
| PAIefs-92F  | GAAACAGGTAGACGCTAACG      | 521           | PAIefs-78F       | GGTTCACAAAGCTGAAGCAG    | 198 |
| PAIefs-92R  | AACGTAATCTTTTCCCCGC       |               | PAIefs-78R       | CCTCCAGCAACAGTTAATCC    |     |
| PAIefs-95F  | GGAAACTGGAGGAAATGCTTG     | 508           | PAIefs-79F       | AGAGAATGCTGACGAAAACAC   | 191 |
| PAIefs-95R  | CGGTCTATCGTCCACACTAC      |               | PAIefs-79R       | GCGCTACACTTACAACAATCC   |     |
| PAIefs-99F  | AATTTGGACTTCCAAGCGAC      | 530           | PAIefs-80F       | AGAATTGATGATCGCTTGATCC  | 153 |
| PAIefs-99R  | ACTATTTTCATTCCCCAGGGC     |               | PAIefs-80R       | CGAAGAAATTCAGCAGGAAC    |     |
| PAIefs-102F | GCGCATTTAAGAGTGCAAAATG    | 582           | PAIefs-81F       | CCTGTTGTTTCTATGACGCC    | 200 |
| PAIefs-102R | TGCGGCTAGTAAGTAACCAAC     |               | PAIefs-81R       | ACCATTCCCAAATTAACCTCAG  |     |
| PAIefs-108F | AATGCAAAACCAGCTCTTAGAC    | 409           | PAIefs-82F       | ACGATTTCGATGCTGCAAC     | 202 |
| PAIefs-108R | GGTCGATGGTCAATTCATCAG     |               | PAIefs-82R       | TCATCTGTATCCCAGCCAAG    |     |
| PAIefs-111F | GTGACGACAGAAGAACAACACTAC  | 585           | PAIefs-83F       | GGAGCTGATAATGCTTGTGC    | 202 |
| PAIefs-111R | TCTCTTGAAAGGAACTGCC       |               | PAIefs-83R       | AAGAATTACCTGCTGCCAAC    |     |
| PAIefs-115F | CCACCAATGCACATAATCAAAAC   | 471           | PAIefs-92F       | GCTTTAGTTTCACTACAATCCCC | 194 |
| PAIefs-115R | GTAATGAAGCGGAGACAACG      |               | PAIefs-92R       | GCGTCTACCTGCTTCTTAATTAC |     |
| PAIefs-122F | TGTTTCAGGTTCAAGTTCAGC     | 505           | PAIefs-93F       | GGGAACATATGCCGGAATG     | 293 |
| PAIefs-122R | TCAACCTCAATGGAAATGTGG     |               | PAIefs-93R       | CATGATGCACAAATTAGCACTG  |     |
| PAIefs-128F | ACCAGAAAACTGAAAGAGACG     | 548           | PAIefs-94F       | GGCGATGCTATTTCTCATGC    | 223 |
| PAIefs-128R | GACTGGAAGCATTTTGGGC       |               | PAIefs-94R       | CGGTTGAGCTATTTGCAACAC   |     |
| PAIefs-13F  | AAAGAGCAGCAAGTCTCAAAG     | 293           | PAIefs-119F      | TCATCTCCTTCTTTCCCTGC    | 193 |
| PAIefs-13R  | TGAGAAACGGTCACAACAC       |               | PAIefs-119R      | AACGACTGATTACGCTTGAC    |     |
| PAIefs-14F  | AAGGCAATGCTCAATCAGG       | 251           | PAIefs-123F      | CCACCGAAGTTGAGTGTATC    | 198 |
| PAIefs-14R  | CCTACGTATCTTCTTTTCGGTG    |               | PAIefs-123R      | TCGATCTTCTGCTTCTTGTTT   |     |
| PAIefs-15F  | TATGAACGCCAGCGATTTC       | 202           | PAIefs-126F      | CCAAACACGACTTCTTGCTC    | 198 |
| PAIefs-15R  | GGGGGACTTTACTTTCTACGAC    |               | PAIefs-126R      | CACGGATTCACTGCTAAAGG    |     |
| PAIefs-16F  | TTTAGCTGCTGGATTGCG        | 229           | PAIefs-129F      | AGCCAATGAAACGACAGAAG    | 214 |
| PAIefs-16R  | CGTTGGTCTATCAAGCAACTTC    |               | PAIefs-129R      | CGGCTCAATACCAGAATTCC    |     |
| PAIefs-17F  | GGTGATTTTAGGACTGGTATCC    | 199           | PAIefs-128-129 F | ATCAGGTCAAACGGATCAAA    | 197 |
| PAIefs-17R  | TCGCCAACCTTTTATTTGGG      |               | PAIefs-128-129 R | CTGACAGAATGGCTCGTCTT    |     |
| PAIefs-18F  | TTTGCGCCAAACGGCATTC       | 181           | PAIefs-125-F     | CTAGGAATACAGCGACCAATAC  | 597 |
| PAIefs-18R  | AAGAAAAGAGCGTCCACACAAG    |               | PAIefs-125-R     | CCGACTTTGCTATCGGAAC     |     |
| PAIefs-19F  | AGATTACACCGAGGATGTAGC     | 174           | PAIefs-126-F     | TTTTGTCCAAGTGACATCGG    | 628 |
| PAIefs-19R  | TCTTCGCTCTCACAATCAAAAG    |               | PAIefs-126-R     | TTCAGAGATGGAACAAGAGTG   |     |
| PAIefs-20F  | TCAACTGTGTTATTGGCGG       | 218           | PAIefs-128F      | AGGGACAGGGTTTTCGATTT    | 477 |
| PAIefs-20R  | CGTAGCTTTACCTGTAGCCTG     |               | PAIefs-128R      | ATTTGGTTCGCCTTCTCTTT    |     |
| PAIefs-57F  | ACGTCAAACCGTATCCAAG       | 179           | oxiRed-F         | AACTGGTTTGAACCGTGAGG    | 385 |
| PAIefs-57R  | AGCCGTCCGTAATAAAAAGC      |               | oxiRed-R         | TTGCATCAATGGTGACCAAG    |     |
| PAIefs-59F  | GCAGAAAAAGGGAAGAAATTACAAC | 289           |                  |                         |     |
| PAIefs-59R  | CTGGAAAAATACCGAATCTTAGTTG |               |                  |                         |     |
